# Supplementary material for: Chemical and Sensory Characterization of Vidal Icewines Fermented with Different Yeast Strains
Source: MDPI journal article supplement (doi:10.3390/fermentation7040211), 2021-09-29
Supplement: s1 [file s1]

---

**Table S1.** Aroma descriptor reference.

| No. | Aroma descriptors | Reference standards                         |
|-----|-------------------|---------------------------------------------|
| 1   | nut               | <i>Le Nez du Vin</i> - prune,               |
| 2   | tropical fruit    | <i>Le Nez du Vin</i> - pineapple and banana |
| 3   | apricot           | <i>Le Nez du Vin</i> - apricot or peach     |
| 4   | honey             | <i>Le Nez du Vin</i> - honey                |
| 5   | caramel           | <i>Le Nez du Vin</i> - caramel              |
| 6   | rose              | <i>Le Nez du Vin</i> - rose                 |

---

**Table S2.** Information on 156 compounds with aroma characteristics ( $\mu\text{g}\cdot\text{L}^{-1}$ ).

| Name                          | CAS        | K1                 | EC1118             | ST                 | R2                  | Odor                     |
|-------------------------------|------------|--------------------|--------------------|--------------------|---------------------|--------------------------|
| 1-Nonanol                     | 143-08-8   | $9.49 \pm 0.33$    | $7.77 \pm 0.02$    | $16.53 \pm 1.96$   | $6.95 \pm 0.00$     | fat, green               |
| (Z)-2-Penten-1-ol             | 1576-95-0  | $2.88 \pm 0.02$    | $2.33 \pm 0.14$    | $3.79 \pm 0.43$    | $3.10 \pm 0.28$     | green, plastic, rubber   |
| 3-Octanol                     | 589-98-0   | $86.48 \pm 8.71$   | $94.11 \pm 5.83$   | $261.55 \pm 16.17$ | $218.14 \pm 4.76$   | chemical, metal, burnt   |
| 1-Octanol                     | 111-87-5   | $57.68 \pm 1.48$   | $59.09 \pm 2.67$   | $56.72 \pm 4.68$   | $55.05 \pm 2.31$    | moss, nut, mushroom      |
| (E)- 2-Octen-1-ol             | 18409-17-1 | $63.06 \pm 3.02$   | $58.51 \pm 6.35$   | $56.50 \pm 3.93$   | $34.47 \pm 2.76$    | mushroom                 |
| 3-Heptanol                    | 589-82-2   | $1.86 \pm 0.14$    | $2.36 \pm 0.12$    | $1.84 \pm 0.09$    | $2.66 \pm 0.21$     | chemical, green          |
| 3-ethoxy- 1-Propanol          | 111-35-3   | $12.02 \pm 1.05$   | $18.63 \pm 0.83$   | $11.93 \pm 1.26$   | $9.06 \pm 0.02$     | fruit                    |
| 2-Nonanol                     | 628-99-9   | $31.01 \pm 2.39$   | $29.84 \pm 1.58$   | $25.41 \pm 1.72$   | $28.93 \pm 0.38$    | cucumber                 |
| 1-Undecanol                   | 112-42-5   | $0.33 \pm 0.01$    | $0.77 \pm 0.08$    | $0.45 \pm 0.02$    | $0.67 \pm 0.08$     | mandarin                 |
| 1-Decanol                     | 112-30-1   | $3.06 \pm 0.18$    | $2.98 \pm 0.23$    | $2.04 \pm 0.15$    | $1.88 \pm 0.13$     | fat                      |
| 3-methyl-1-Butanol            | 123-51-3   | $508.32 \pm 50.59$ | $18.01 \pm 1.14$   | $657 \pm 19.36$    | $1488.75 \pm 23.63$ | whiskey, malt, burnt     |
| 1-octen-3-ol                  | 3391-86-4  | $41.40 \pm 0.97$   | $111.92 \pm 12.86$ | $69.78 \pm 1.66$   | $114.08 \pm 0.98$   | soap, plastic            |
| 2-Butanol                     | 78-92-2    | $2.64 \pm 0.00$    | $4.21 \pm 0.42$    | $2.02 \pm 0.00$    | $4.51 \pm 0.00$     | medicine, fruit          |
| 1-Propanol                    | 71-23-8    | $100.97 \pm 13.63$ | $113.23 \pm 8.01$  | $100.32 \pm 13.18$ | $169.14 \pm 5.24$   | alcohol, pungent         |
| isobutyl alcohol              | 78-83-1    | $366.78 \pm 16.74$ | $426.04 \pm 18.44$ | $393.49 \pm 13.08$ | $533.37 \pm 8.43$   | wine, solvent, bitter    |
| 3-Pentanol                    | 584-02-1   | $19.66 \pm 0.96$   | $25.83 \pm 2.20$   | $16.47 \pm 1.14$   | $29.33 \pm 2.23$    | balsamic                 |
| 1-Butanol, 3-methyl-, acetate | 123-92-2   | $128.35 \pm 2.07$  | $142.25 \pm 7.41$  | $88.78 \pm 4.37$   | $209.13 \pm 15.61$  | banana                   |
| 2-Pentanol                    | 6032-29-7  | $24.29 \pm 0.02$   | $24.14 \pm 0.17$   | $23.9 \pm 0.00$    | $27.55 \pm 2.80$    | green                    |
| 1-Butanol                     | 71-36-3    | $127.26 \pm 3.18$  | $143.79 \pm 16.1$  | $89.89 \pm 0.59$   | $152.22 \pm 1.16$   | wine                     |
| 1-Penten-3-ol                 | 616-25-1   | $23.29 \pm 0.08$   | $23.94 \pm 1.72$   | $13.25 \pm 0.40$   | $26.16 \pm 0.78$    | butter, pungent          |
| 1-Pentanol                    | 71-41-0    | $77.81 \pm 0.23$   | $82.36 \pm 7.91$   | $85.55 \pm 2.21$   | $100.91 \pm 0.88$   | fruit                    |
| 1-Hexanol                     | 111-27-3   | $211.3 \pm 2.13$   | $279.92 \pm 20.48$ | $200.79 \pm 12.61$ | $284.22 \pm 16.93$  | resin, flower, green     |
| 3-hexen-1-ol                  | 928-97-2   | $35.31 \pm 3.10$   | $40.57 \pm 1.85$   | $20.65 \pm 1.80$   | $67.91 \pm 1.82$    | moss, fresh              |
| (Z)-2-Hexen-1-ol              | 928-94-9   | $2.37 \pm 0.07$    | $2.27 \pm 0.05$    | -                  | $2.73 \pm 0.20$     | leaf, green, wine, fruit |

|                                          |            |                |                |                |                 |                                 |
|------------------------------------------|------------|----------------|----------------|----------------|-----------------|---------------------------------|
| 1-heptanol                               | 111-70-6   | 135.31 ± 3.10  | 140.57 ± 10.85 | 120.65 ± 7.80  | 167.91 ± 10.82  | herb                            |
| 2-methyl-Propanoic acid,                 | 79-31-2    | 59.91 ± 0.29   | 67.36 ± 0.51   | 37.81 ± 3.15   | 67.98 ± 0.63    | rancid, butter, cheese          |
| 2,3-Butanediol                           | 513-85-9   | 704.98 ± 68.43 | 614.67 ± 56.74 | 76.66 ± 6.38   | 1262.81 ± 36.77 | fruit, onion                    |
| Undecanal                                | 112-44-7   | 1.00 ± 0.08    | 0.88 ± 0.06    | 0.78 ± 0.01    | 1.36 ± 0.04     | oil, pungent, sweet             |
| (E,Z)-3,6-Nonadien-1-ol                  | 56805-23-3 | 1.83 ± 0.13    | 2.94 ± 0.28    | 1.12 ± 0.12    | 3.21 ± 0.17     | fish                            |
| Acetic acid,2-phenylethyl ester          | 103-45-7   | 289.29 ± 14.27 | 115.32 ± 10.86 | 396.14 ± 10.4  | 145.99 ± 14.34  | rose, honey, tobacco            |
| Benzoic acid, methyl ester               | 93-58-3    | 1.00 ± 0.11    | 0.80 ± 0.09    | 1.04 ± 0.02    | 0.75 ± 0.00     | prune, lettuce, herb, sweet     |
| Benzoic acid, ethyl ester                | 93-89-0    | 29.57 ± 2.20   | 34.33 ± 1.24   | 37.56 ± 3.58   | 22.91 ± 0.00    | camomile, flower, celery, fruit |
| Acetic acid, phenylmethyl ester          | 140-11-4   | 0.45 ± 0.03    | 0.51 ± 0.02    | 0.94 ± 0.08    | 0.49 ± 0.05     | fresh, boiled vegetable         |
| Benzeneacetic acid, ethyl ester          | 101-97-3   | 114.67 ± 4.79  | 42.83 ± 3.50   | 150.64 ± 3.26  | 93.18 ± 0.34    | fruit, sweet                    |
| Benzenemethanol                          | 100-51-6   | 7.00 ± 0.76    | 7.40 ± 0.38    | 14.34 ± 1.70   | 6.23 ± 0.17     | sweet, flower                   |
| 2-Propenoic acid, 3-phenyl-, ethyl ester | 103-36-6   | 0.44 ± 0.03    | 0.46 ± 0.03    | 0.54 ± 0.00    | 0.26 ± 0.01     | honey, cinnamon                 |
| 2-Hydroxybenzoic acid methyl ester       | 119-36-8   | 3.32 ± 0.07    | 3.48 ± 0.24    | 2.64 ± 0.18    | 1.97 ± 0.06     | peppermint                      |
| Benzoic acid                             | 65-85-0    | 5.84 ± 0.45    | 6.90 ± 0.47    | 4.80 ± 0.57    | 4.15 ± 0.45     | urine                           |
| Ethyl vanillate                          | 617-05-0   | 0.23 ± 0.01    | 0.43 ± 0.02    | 0.13 ± 0.01    | 0.28 ± 0.01     | flower, fruit, sweet, vanilla   |
| 4-ethyl-Benzaldehyde                     | 4748-78-1  | 1.18 ± 0.03    | 1.39 ± 0.06    | 0.70 ± 0.04    | 1.57 ± 0.17     | sweet                           |
| 1-methyl-4-(1-methylethenyl)-Benzene     | 1195-32-0  | 180.47 ± 2.03  | 133.08 ± 9.31  | 120.44 ± 10.64 | 202.62 ± 6.81   | citrus, pine                    |
| Benzaldehyde                             | 100-52-7   | 353.87 ± 7.70  | 350.62 ± 32.99 | 391.22 ± 36.37 | 498.43 ± 12.74  | almond, burnt sugar             |
| Benzenacetaldehyde                       | 122-78-1   | 42.59 ± 1.20   | 42.56 ± 3.88   | 32.79 ± 3.95   | 47.59 ± 0.29    | hawthorne, honey, sweet         |
| 1-(4-methylphenyl)- Ethanone             | 122-00-9   | 0.24 ± 0.01    | 0.28 ± 0.02    | 0.46 ± 0.03    | 2.31 ± 0.20     | bitter almond                   |
| Benzoic acid, 2-hydroxy-, ethyl ester    | 118-61-6   | 3.75 ± 0.31    | 2.09 ± 0.14    | 3.46 ± 0.19    | 12.47 ± 0.92    | wintergreen, mint               |
| Ethyl 3-phenylpropionate                 | 2021-28-5  | 8.38 ± 0.61    | 5.82 ± 0.14    | 3.95 ± 0.19    | 12.33 ± 2.92    | flower                          |
| 5-methyl-2-Furancarboxaldehyde           | 620-02-0   | 2.35 ± 0.08    | 3.19 ± 0.01    | 4.18 ± 0.08    | 2.62 ± 0.33     | almond, caramel, burnt sugar    |
| 2-Furanmethanol                          | 98-00-0    | -              | 0.44 ± 0.00    | 0.74 ± 0.01    | -               | burnt                           |
| 2-pentyl-Furan                           | 3777-69-3  | 42.20 ± 1.67   | 48.05 ± 0.39   | 12.21 ± 0.90   | 52.91 ± 3.64    | green bean, butter              |
| 1-(2-furanyl)- Ethanone                  | 1192-62-7  | 3.95 ± 0.14    | 4.91 ± 0.30    | 4.05 ± 0.42    | 5.17 ± 0.59     | balsamic                        |

|                                           |            |              |              |              |              |                         |
|-------------------------------------------|------------|--------------|--------------|--------------|--------------|-------------------------|
| Trimethyl-Pyrazine                        | 14667-55-1 | 0.36 ± 0.00  | 0.27 ± 0.01  | 0.28 ± 0.00  | 0.36 ± 0.01  | roast, potato, must     |
| Pyridine                                  | 110-86-1   | 0.24 ± 0.02  | 0.41 ± 0.01  | 0.24 ± 0.01  | 3.84 ± 0.11  | rancid                  |
| 2-Methylpyrazine                          | 109-08-0   | 0.46 ± 0.03  | 0.72 ± 0.05  | 1.24 ± 0.02  | 0.83 ± 0.07  | popcorn                 |
| Disulfide, dimethyl                       | 624-92-0   | 6.34 ± 0.39  | 6.02 ± 0.04  | 5.47 ± 0.52  | 6.37 ± 0.13  | onion, cabbage, putrid  |
| Benzothiazole                             | 95-16-9    | 1.64 ± 0.18  | 2.21 ± 0.18  | 2.34 ± 0.17  | 2.31 ± 0.26  | gasoline, rubber        |
| Trisulfide, dimethyl                      | 3658-80-8  | 1.20 ± 0.17  | 2.26 ± 0.17  | 2.09 ± 0.18  | 1.81 ± 0.19  | sulfur, fish, cabbage   |
| 3-(methylthio)-1-Propanol                 | 505-10-2   | 8.17 ± 0.14  | 10.26 ± 0.41 | 5.83 ± 0.48  | 5.50 ± 0.10  | sweet, potato           |
| 4-methyl-Phenol                           | 106-44-5   | 2.64 ± 0.09  | 2.06 ± 0.16  | 2.64 ± 0.29  | 1.77 ± 0.14  | medicine, phenol, smoke |
| 2-methyl-Phenol                           | 95-48-7    | 4.02 ± 0.15  | 6.56 ± 0.00  | 3.62 ± 0.18  | 4.00 ± 0.29  | phenol                  |
| Phenol                                    | 108-95-2   | 18.09 ± 2.26 | 30.65 ± 1.09 | 20.56 ± 1.55 | 15.41 ± 0.91 | phenol                  |
| 4-ethyl-2-methoxy-Phenol                  | 2785-89-9  | 2.58 ± 0.05  | 2.35 ± 0.17  | 2.16 ± 0.23  | 2.71 ± 0.14  | spice, clove            |
| 2-methoxy-4-(2-propenyl)-Phenol           | 97-53-0    | 0.45 ± 0.01  | 0.40 ± 0.02  | 0.32 ± 0.01  | 0.45 ± 0.03  | clove, honey            |
| 3-ethyl-Phenol                            | 620-17-7   | 1.78 ± 0.05  | 2.13 ± 0.07  | 1.18 ± 0.05  | 1.18 ± 0.04  | must                    |
| 2-Methoxy-4-vinylphenol                   | 7786-61-0  | 5.42 ± 0.39  | 7.53 ± 0.29  | 3.22 ± 0.29  | 4.82 ± 0.11  | clove, curry            |
| 2,6-dimethoxy-4-(2-propenyl)-Phenol       | 6627-88-9  | 0.23 ± 0.00  | 0.23 ± 0.03  | 0.12 ± 0.01  | 0.23 ± 0.01  | sweet, flower           |
| 2-ethyl-4-hydroxy-5-methyl-3-(2H)furanone | 27538-09-6 | 0.78 ± 0.02  | 0.67 ± 0.06  | 0.81 ± 0.01  | 0.60 ± 0.00  | cotton candy, sweet     |
| Dihydro-2(3H)-Furanone                    | 96-48-0    | 0.79 ± 0.07  | 0.91 ± 0.09  | 0.78 ± 0.04  | 0.67 ± 0.00  | Hexanoic acid           |
| 5-ethyl-2(5H)-Furanone                    | 2407-43-4  | 0.63 ± 0.03  | 0.89 ± 0.03  | 0.60 ± 0.01  | 0.57 ± 0.06  | spice                   |
| Tetrahydro-6-pentyl-2H-Pyran-2-one        | 705-86-2   | 2.39 ± 0.02  | 2.99 ± 0.31  | 1.09 ± 0.02  | 1.99 ± 0.01  | peach                   |
| 6-heptyltetrahydro-2H-Pyran-2-one         | 713-95-1   | 0.69 ± 0.04  | 0.20 ± 0.00  | 0.12 ± 0.01  | -            | fruit, sweet            |
| (Z)-dihydro-5-(2-octenyl)-2(3H)-Furanone  | 18679-18-0 | 0.93 ± 0.03  | 0.82 ± 0.03  | 0.62 ± 0.01  | 0.57 ± 0.06  | peach, sweet            |
| 5-hexyldihydro-2(3H)-Furanone             | 706-14-9   | 0.54 ± 0.01  | 0.28 ± 0.02  | 0.31 ± 0.03  | 0.15 ± 0.10  | peach, fat              |
| 5-ethyldihydro-2(3H)-Furanone             | 695-06-7   | 46.31 ± 3.54 | 46.03 ± 2.63 | 48.99 ± 2.51 | 51.38 ± 1.19 | coumarin, sweet         |
| Dihydro-5-propyl-2(3H)-Furanone           | 105-21-5   | 1.90 ± 0.13  | 2.12 ± 0.13  | 2.16 ± 0.07  | 2.89 ± 0.27  | nut, fat, fruit         |
| 2-methyl-2-Butenal                        | 1115-11-3  | 0.24 ± 0.00  | -            | 0.15 ± 0.01  | 0.33 ± 0.01  | green, fruit            |
| Pentanal                                  | 110-62-3   | 0.37 ± 0.04  | 1.42 ± 0.13  | 1.66 ± 0.00  | 2.60 ± 0.00  | almond, malt, pungent   |

|                              |             |                  |                  |                  |                  |                           |
|------------------------------|-------------|------------------|------------------|------------------|------------------|---------------------------|
| 2-octenal                    | 2548-87-0   | 0.75 ± 0.08      | 0.90 ± 0.02      | 0.40 ± 0.01      | 1.43 ± 0.02      | green, nut, fat           |
| 2-methyl-Butanal             | 96-17-3     | 1.67 ± 0.00      | 1.55 ± 0.15      | 0.89 ± 0.06      | 2.78 ± 0.25      | malt                      |
| 3-methyl-Butanal             | 590-86-3    | 0.49 ± 0.02      | 1.10 ± 0.02      | 0.76 ± 0.00      | 1.67 ± 0.01      | cocoa, almond             |
| Octanal                      | 124-13-0    | 4.80 ± 0.20      | 6.03 ± 0.74      | 3.84 ± 0.28      | 16.95 ± 1.89     | fat, soap, lemon, green   |
| Decanal                      | 112-31-2    | 9.31 ± 0.48      | 10.02 ± 1.05     | 7.84 ± 0.13      | 10.43 ± 0.39     | soap, orange peel, tallow |
| (E,E)-2,4-Octadienal         | 30361-28-5  | 0.34 ± 0.03      | 0.36 ± 0.01      | 0.43 ± 0.02      | 0.13 ± 0.00      | green, seaweed, cucumber  |
| Dodecanal                    | 112-54-9    | 2.77 ± 0.40      | 2.52 ± 0.17      | 3.55 ± 0.01      | 3.03 ± 0.01      | lily, fat, citrus         |
| Nonanal                      | 124-19-6    | 56.35 ± 5.71     | 77.32 ± 0.62     | 26.42 ± 2.42     | 57.79 ± 4.92     | fat, citrus, green        |
| trans-4,5-Epoxy-2(E)-decenal | 134454-31-2 | 0.07 ± 0.00      | 0.28 ± 0.01      | 0.02 ± 0.00      | 0.28 ± 0.01      | metal, green              |
| Acetic acid                  | 64-19-7     | 1191.14 ± 122.03 | 1216.82 ± 108.67 | 1297.73 ± 113.08 | 1476.64 ± 134.34 | sour                      |
| Pentanoic acid               | 109-52-4    | 30.36 ± 0.34     | 32.55 ± 1.51     | 28.56 ± 2.63     | 36.73 ± 0.62     | sweat                     |
| Nonanoic acid                | 112-05-0    | -                | 9.05 ± 0.90      | 24.34 ± 0.21     | 0.90 ± 0.00      | green, fat                |
| Decanoic acid                | 334-48-5    | 27.87 ± 1.00     | 18.10 ± 1.77     | 31.36 ± 2.92     | 13.92 ± 1.49     | rancid, fat               |
| Hexanoic acid                | 142-62-1    | 112.94 ± 12.63   | 282.66 ± 22.23   | 108.40 ± 5.68    | 197.12 ± 8.54    | sweat                     |
| Octanoic acid                | 124-07-2    | 0.99 ± 0.08      | 2.69 ± 0.02      | 0.73 ± 0.05      | 0.45 ± 0.02      | sweat, cheese             |
| Butanoic acid                | 107-92-6    | 84.59 ± 1.33     | 88.94 ± 0.18     | 58.78 ± 5.18     | 135.39 ± 2.89    | rancid, cheese, sweat     |
| β-Citral                     | 106-26-3    | 0.06 ± 0.00      | -                | 0.38 ± 0.01      | 0.19 ± 0.02      | lemon                     |
| à-Calacorene                 | 21391-99-1  | 0.93 ± 0.05      | 0.74 ± 0.04      | 0.44 ± 0.05      | 1.47 ± 0.15      | wood                      |
| Nerol                        | 106-25-2    | 1.93 ± 0.05      | 1.82 ± 0.05      | 1.55 ± 0.10      | 2.02 ± 0.13      | oil, flower               |
| β-Cyclocitral                | 432-25-7    | 2.98 ± 0.32      | 2.61 ± 0.09      | 1.75 ± 0.03      | 3.07 ± 0.05      | mint                      |
| α-Terpinolene                | 586-62-9    | 11.58 ± 0.00     | -                | 8.21 ± 0.52      | 13.72 ± 1.68     | pine, plastic             |
| 1,4-Cineole                  | 470-67-7    | 5.64 ± 0.43      | 5.58 ± 0.40      | 4.79 ± 0.33      | 7.53 ± 0.21      | pine                      |
| γ-Terpinene                  | 99-85-4     | 61.45 ± 1.32     | 55.28 ± 6.47     | 33.43 ± 1.15     | 78.67 ± 7.60     | gasoline, turpentine      |
| β-Damascenone                | 23726-93-4  | 71.61 ± 1.19     | 54.99 ± 0.39     | 30.98 ± 3.86     | 85.43 ± 2.50     | apple. rose, honey        |
| β-Myrcene                    | 123-35-3    | 3.13 ± 0.18      | 4.62 ± 0.23      | 2.86 ± 0.21      | 7.68 ± 0.66      | balsamic, must, spice     |
| α-Phellandrene               | 99-83-2     | 13.07 ± 1.01     | 13.12 ± 0.95     | 9.55 ± 1.50      | 17.25 ± 0.76     | turpentine, mint, spice   |

|                                              |            |                    |                    |                    |                    |                          |
|----------------------------------------------|------------|--------------------|--------------------|--------------------|--------------------|--------------------------|
| $\alpha$ -Terpinene                          | 99-86-5    | 0.38 $\pm$ 0.00    | 50.98 $\pm$ 4.50   | 38.59 $\pm$ 2.06   | 68.72 $\pm$ 5.65   | lemon                    |
| Dill ether                                   | 74410-10-9 | 10.49 $\pm$ 0.64   | 13.61 $\pm$ 1.07   | 8.76 $\pm$ 0.67    | 15.09 $\pm$ 1.51   | dill                     |
| Linalool                                     | 78-70-6    | 49.61 $\pm$ 3.23   | 72.12 $\pm$ 2.08   | 50.55 $\pm$ 5.11   | 103.33 $\pm$ 3.81  | lavender, wood           |
| $\beta$ -Citronellol                         | 106-22-9   | 16.4 $\pm$ 1.73    | 14.86 $\pm$ 1.43   | 12.21 $\pm$ 1.29   | 18.67 $\pm$ 0.44   | rose                     |
| Geraniol                                     | 106-24-1   | 4.30 $\pm$ 0.13    | 3.90 $\pm$ 0.30    | 3.05 $\pm$ 0.35    | 7.10 $\pm$ 0.29    | rose, geranium           |
| 4-methyl-1-(1-methylethyl)-3-Cyclohexen-1-ol | 562-74-3   | 203.48 $\pm$ 12.29 | 161.88 $\pm$ 14.28 | 288.12 $\pm$ 21.51 | 53.42 $\pm$ 5.24   | turpentine, nutmeg, must |
| D-Fenchyl alcohol                            | 1632-73-1  | 0.19 $\pm$ 0.02    | -                  | 0.34 $\pm$ 0.03    | 0.13 $\pm$ 0.00    | camphor                  |
| Piperitone                                   | 89-81-6    | 3.37 $\pm$ 0.07    | 3.48 $\pm$ 0.29    | 2.62 $\pm$ 0.18    | 1.97 $\pm$ 0.06    | mint, fresh              |
| Geranyl acetone                              | 3796-70-1  | 5.54 $\pm$ 0.67    | 16.52 $\pm$ 0.93   | 4.97 $\pm$ 0.35    | 6.40 $\pm$ 0.03    | magnolia, green          |
| 1,8-Cineole                                  | 470-82-6   | 0.79 $\pm$ 0.02    | 0.91 $\pm$ 0.09    | 0.78 $\pm$ 0.04    | 0.67 $\pm$ 0.02    | mint, sweet              |
| 2,3-Pentanedione                             | 600-14-6   | 1.10 $\pm$ 0.10    | 1.34 $\pm$ 0.17    | 0.49 $\pm$ 0.01    | 1.50 $\pm$ 0.03    | cream, butter            |
| 1-Hexen-3-one                                | 1629-60-3  | 0.84 $\pm$ 0.03    | 1.00 $\pm$ 0.09    | 0.54 $\pm$ 0.01    | 1.64 $\pm$ 0.08    | cooked vegetable, metal  |
| 2,3-Butanedione                              | 431-03-8   | 2.58 $\pm$ 0.11    | 3.27 $\pm$ 0.29    | 1.32 $\pm$ 0.19    | 3.43 $\pm$ 0.28    | butter                   |
| 1-Penten-3-one                               | 1629-58-9  | 0.57 $\pm$ 0.03    | 0.89 $\pm$ 0.08    | 0.40 $\pm$ 0.00    | 1.10 $\pm$ 0.02    | fish, pungent            |
| 4-methyl-3-Penten-2-one                      | 141-79-7   | -                  | 0.74 $\pm$ 0.00    | 0.41 $\pm$ 0.02    | 0.79 $\pm$ 0.01    | sweet, chemical          |
| 3-Octanone                                   | 106-68-3   | 7.97 $\pm$ 0.23    | 6.77 $\pm$ 0.00    | 6.65 $\pm$ 0.42    | 8.07 $\pm$ 0.17    | soap, gasoline           |
| 2-Octanone                                   | 111-13-7   | 5.09 $\pm$ 0.63    | 4.81 $\pm$ 0.08    | 4.85 $\pm$ 0.22    | 7.41 $\pm$ 0.20    | herb, butter, resin      |
| 1-Octen-3-one                                | 4312-99-6  | 9.96 $\pm$ 1.14    | 10.83 $\pm$ 0.91   | 7.71 $\pm$ 0.35    | 14.55 $\pm$ 0.68   | mushroom, metal          |
| 6-Methyl-5-Hepten-2-one                      | 110-93-0   | 31.79 $\pm$ 2.94   | 29.65 $\pm$ 1.16   | 27.72 $\pm$ 2.13   | 49.30 $\pm$ 1.65   | pepper, mushroom, rubber |
| 2-Nonanone                                   | 821-55-6   | 4.15 $\pm$ 0.20    | 4.07 $\pm$ 0.13    | 3.90 $\pm$ 0.41    | 4.17 $\pm$ 0.21    | hot milk, soap, green    |
| 2-Undecanone                                 | 112-12-9   | 1.06 $\pm$ 0.02    | 1.39 $\pm$ 0.15    | 2.20 $\pm$ 0.21    | 1.23 $\pm$ 0.13    | orange, fresh, green     |
| 2-Hexanone                                   | 591-78-6   | 0.63 $\pm$ 0.04    | 1.52 $\pm$ 0.15    | 0.30 $\pm$ 0.01    | 1.12 $\pm$ 0.01    | ether, grape             |
| 3-hydroxy-2-Butanone                         | 513-86-0   | 49.04 $\pm$ 4.25   | 49.89 $\pm$ 3.12   | 46.76 $\pm$ 0.95   | 47.14 $\pm$ 0.13   | butter, cream            |
| Octanoic acid, ethyl ester                   | 106-32-1   | 151.46 $\pm$ 10.63 | 763.81 $\pm$ 20.32 | 81.16 $\pm$ 8.58   | 790.81 $\pm$ 58.84 | fruit, fat               |
| Hexanoic acid, ethyl ester                   | 123-66-0   | 442.56 $\pm$ 27.68 | 633.02 $\pm$ 15.37 | 227.37 $\pm$ 3.45  | 747.76 $\pm$ 30.14 | apple peel, fruit        |
| Butanoic acid,3-methyl-, ethyl ester         | 108-64-5   | 12.23 $\pm$ 0.45   | 9.21 $\pm$ 1.05    | 9.60 $\pm$ 0.56    | 15.00 $\pm$ 0.09   | fruit                    |

|                                     |           |                |                |                |                |                      |
|-------------------------------------|-----------|----------------|----------------|----------------|----------------|----------------------|
| Hexanoic acid, methyl ester         | 106-70-7  | 29.50 ± 2.67   | 27.50 ± 2.04   | 21.54 ± 1.87   | 35.81 ± 1.05   | fruit, fresh, sweet  |
| Acetic acid ethyl ester             | 141-78-6  | 313.15 ± 17.29 | 292.49 ± 33.81 | 374.83 ± 15.88 | 841.98 ± 30.65 | pineapple            |
| ethyl isobutyrate                   | 97-62-1   | 94.52 ± 3.43   | 73.74 ± 1.89   | 57.28 ± 5.22   | 96.80 ± 2.01   | sweet, rubber        |
| Butanoic acid, methyl ester         | 623-42-7  | 0.99 ± 0.04    | 1.07 ± 0.08    | 0.75 ± 0.03    | 1.52 ± 0.08    | ether, fruit, sweet  |
| Acetic acid, 2-methylpropyl ester   | 110-19-0  | 225.18 ± 3.38  | 247.11 ± 24.9  | 131.01 ± 6.64  | 271.01 ± 15.04 | fruit, apple, banana |
| Butanoic acid, ethyl ester          | 105-54-4  | 145.24 ± 10.61 | 238.62 ± 24.70 | 233.70 ± 10.23 | 308.32 ± 26.61 | apple                |
| Propanoic acid, propyl ester        | 106-36-5  | 0.34 ± 0.03    | 0.40 ± 0.03    | 0.44 ± 0.01    | 1.26 ± 0.01    | pineapple            |
| Acetic acid, butyl ester            | 123-86-4  | 44.38 ± 0.25   | 26.46 ± 2.53   | 21.34 ± 1.95   | 55.62 ± 3.98   | pear                 |
| Acetic acid,hexyl ester             | 142-92-7  | 32.23 ± 2.49   | 29.48 ± 0.69   | 22.96 ± 1.92   | 58.06 ± 2.08   | fruit, herb          |
| Propyl hexanoate                    | 626-77-7  | 1.21 ± 0.10    | 1.00 ± 0.07    | 1.05 ± 0.13    | 1.81 ± 0.19    | fruit                |
| Heptanoic acid, ethyl ester         | 106-30-9  | 213.31 ± 11.11 | 252.87 ± 11.04 | 234.26 ± 19.59 | 261.87 ± 24.87 | fruit                |
| Hexanoic acid, butyl ester          | 626-82-4  | 0.84 ± 0.04    | 0.63 ± 0.06    | 1.04 ± 0.06    | 1.93 ± 0.05    | fruit                |
| 3-Hydroxy-butanoic acid ethyl ester | 5405-41-4 | 0.67 ± 0.01    | 0.92 ± 0.08    | 1.53 ± 0.07    | 2.29 ± 0.03    | marshmallow          |
| Propanedioic acid, diethyl ester    | 105-53-3  | 14.56 ± 0.00   | 15.33 ± 0.26   | 11.29 ± 1.03   | 17.79 ± 0.74   | apple                |
| Hexanoic acid, hexyl ester          | 6378-65-0 | 0.37 ± 0.01    | 0.48 ± 0.01    | 0.36 ± 0.04    | 0.46 ± 0.02    | apple peel, peach    |
| Butanedioic acid, diethyl ester     | 123-25-1  | 144.71 ± 5.13  | 148.74 ± 12.04 | 474.16 ± 50.26 | 456.84 ± 27.19 | wine, fruit          |
| Nonanoic acid, methyl ester         | 1731-84-6 | 1.82 ± 0.13    | 1.90 ± 0.16    | 2.51 ± 0.22    | 1.73 ± 0.09    | coconut              |
| Decanoic acid,methyl ester          | 110-42-9  | 13.26 ± 1.37   | 11.57 ± 1.42   | 13.99 ± 0.23   | 6.09 ± 0.71    | wine                 |
| Dodecanoic acid, methyl ester       | 111-82-0  | 0.66 ± 0.05    | 0.61 ± 0.04    | 0.75 ± 0.04    | 0.37 ± 0.02    | fat, coconut         |
| Dodecanoic acid, ethyl ester        | 106-33-2  | 80.84 ± 2.40   | 39.45 ± 2.19   | 109.28 ± 7.22  | 27.85 ± 0.19   | leaf                 |
| Pentadecanoic acid, ethyl ester     | 539-82-2  | 82.71 ± 1.75   | 96.35 ± 3.71   | 127.84 ± 6.05  | 59.69 ± 3.03   | yeast, fruit         |
| Hexadecanoic acid, ethyl ester      | 628-97-7  | 100.90 ± 0.85  | 67.98 ± 4.99   | 116.98 ± 11.57 | 60.52 ± 4.21   | wax                  |
| Butylcaprylate                      | 589-75-3  | 0.47 ± 0.01    | 1.10 ± 0.10    | 0.64 ± 0.04    | 0.88 ± 0.09    | fruit                |
| ethyl 2-methylbutyrate              | 7452-79-1 | 27.61 ± 0.69   | 28.94 ± 1.37   | 16.39 ± 0.93   | 19.67 ± 0.81   | apple                |
| Undecanoic acid, ethyl ester        | 627-90-7  | 0.65 ± 0.05    | 0.75 ± 0.02    | 0.46 ± 0.01    | 0.71 ± 0.05    | cognac, coconut      |
| Hexyl octanoate                     | 1117-55-1 | 0.28 ± 0.01    | 0.55 ± 0.04    | 0.29 ± 0.03    | 0.46 ± 0.04    | herb, green, oil     |

---

|                             |          |                    |                   |                   |                    |        |
|-----------------------------|----------|--------------------|-------------------|-------------------|--------------------|--------|
| Decanoic acid, ethyl ester  | 110-38-3 | $100.98 \pm 8.58$  | $54.82 \pm 3.36$  | $63.82 \pm 4.18$  | $59.32 \pm 3.68$   | grape  |
| Octanoic acid, methyl ester | 111-11-5 | $287.00 \pm 15.12$ | $173.23 \pm 5.08$ | $147.68 \pm 1.72$ | $179.84 \pm 17.92$ | orange |

---



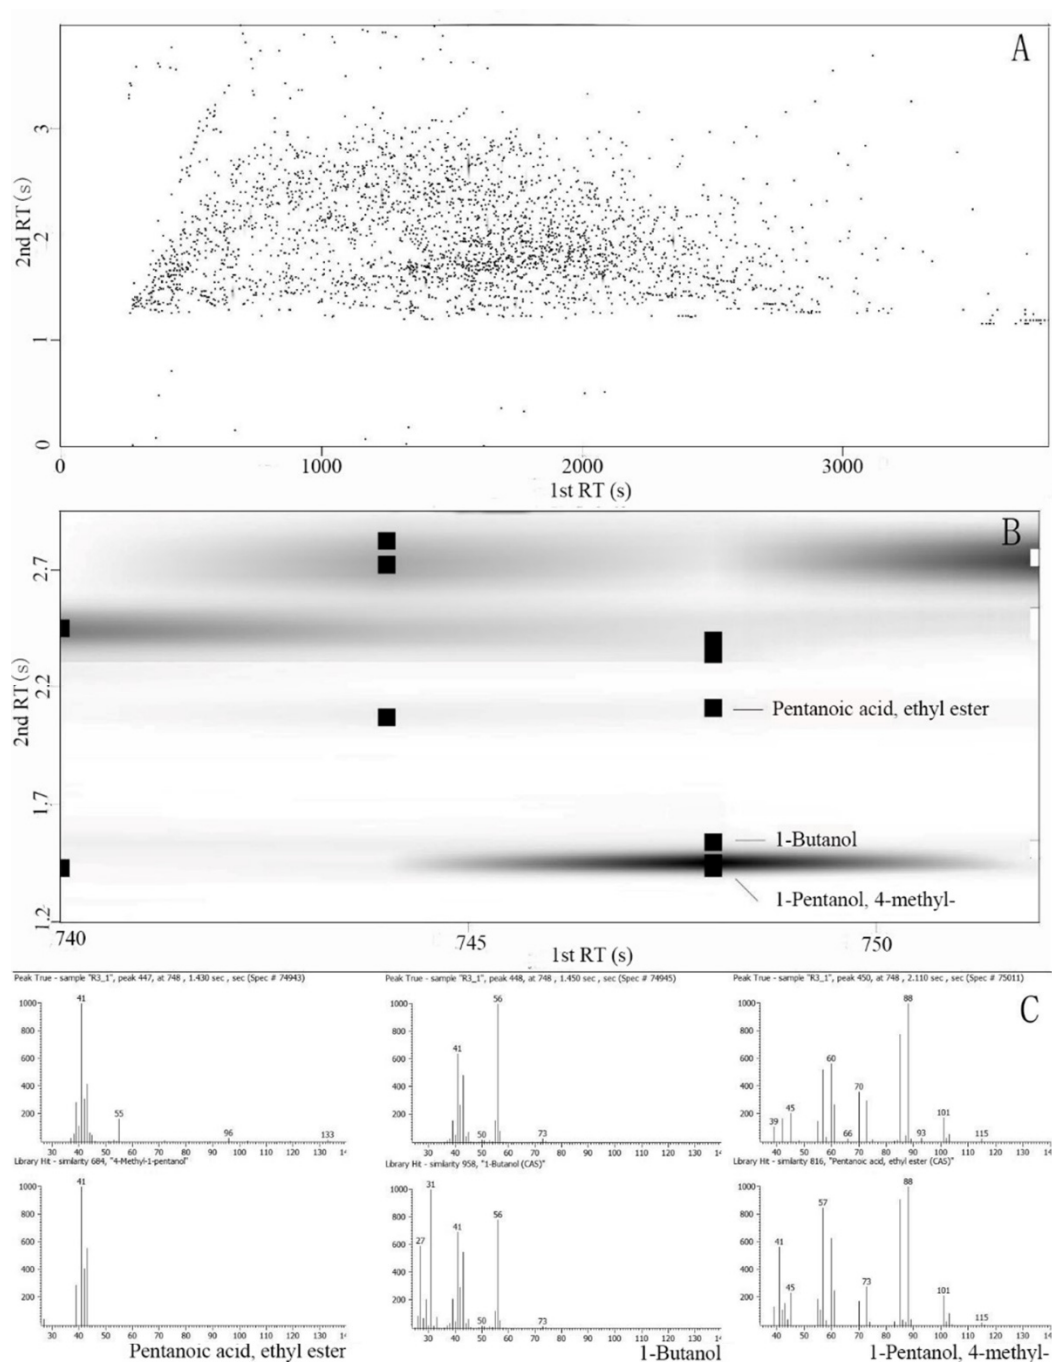

**Figure S1.** Analytical ion chromatogram contour plot analysis of volatile components in icewine fermented R2 yeast (A) and modulated peaks of 3 compounds found in icewine (B) and deconvoluted mass spectra of 3 compounds (C) .
